# Supplementary material for: Towards a low-resolution infrared sounder for monitoring atmospheric ammonia (NH 3 ) at high spatial resolution
Source: Copernicus journal article supplement (doi:10.5194/egusphere-2024-3455), 2025-01-20
Supplement: Supplementary file [file egusphere-2024-3455-RC1-supplement.pdf]

"Towards a low-resolution infrared sounder for monitoring atmospheric ammonia (NH<sub>3</sub>) at high spatial resolution"

Lara Noppen, Lieven Clarisse, Frederik Tack, Thomas Ruhtz, Martin Van Damme, Michel Van Roozendaal, Dirk Schuettemeyer, and Pierre Coheur

The study detailed in this paper describes an evaluation tool to investigate the optimum configuration for a dedicated satellite based NH<sub>3</sub> sounding instrument. A modelled spectral simulation, using line-by-line radiative simulation, is used to identify a selection of optimal configurations for a hypothetical spaceborne imager capable of high spatial resolution measurements with sufficient NH<sub>3</sub> retrieval sensitivity to identify and isolate single point NH<sub>3</sub> emission sources.

The authors apply these configurations to existing data sets acquired by IASI and Hyper cams to compare and contrast NH<sub>3</sub> identification over a large geographical range for IASI and for selected regional sites in the case of Hyper-cams.

The observational data sets from the IASI instrument on METOP-B and the Hyper-Cam LW system on a Cessna T207A aircraft are degraded to simulate measurements from low resolution and descoped spectral range instruments. System noise, background "clutter", signal-to-noise and False alarm rates are defined and used to assess NH<sub>3</sub> column retrieval capability as the observed spectral resolution is reduced over a continuous spectral range and/or a combination of selective bands within a given spectral range are isolated.

The authors demonstrate that low-cost descoped instruments, with sufficient retrieval sensitivity for NH<sub>3</sub> emissions monitoring can be achieved.

The paper is very well written and structured. The description of methodology, application and results are clear and the assessment and conclusion sound. I believe the evaluation tool offers a new and solid base to undertake future instrument optimisation.

I recommend this paper for publication with some minor modifications.

The overall paper can be a little improved if the authors could discuss the current state-of-the-art to put this tool into a real-world perspective, for instance some detail on the available narrow-band filters/detector combinations that might be required to isolate spectral bands, and their efficiency would be informative. Will these form part of an FTS system, to provide the spectrally resolved measurements after isolating individual bands?

The authors indicate that only the 9:30 local time IASI data were used for this study. Is this to better match a daytime peak in NH<sub>3</sub> emissions? was the 21:30 overpass ever considered to evaluate the capability to observe a diurnal cycle in emission or does the reduction in thermal

contrast make this unfeasible. Emissions in April 2020 would have been impacted by the COVID lockdown, given these may therefore not be typical emission scenarios, i.e. potential for reduced background levels, are there any implications for the comparison.

#### 4.1 from simulated spectra

Reading through the description on the measurement uncertainty as a function of range and resolution, figure 1b indicates to me that, for the two ranges indicated, the resolution should not be higher than 1.21 cm<sup>-1</sup> for the given NH<sub>3</sub> retrieval baseline at the specified noise(temperature) level. I think this can be more explicitly stated. Hyper-Cam is then shown to be on the edge of this limit and gives a good justification for the pixel averaging used later.

line 208: missing units on the 2 (cm)

#### 4.2 From IASI

This comparison of simulated instrument configurations is very informative. If IASI at its native resolution is to be taken as "truth", as shown in figure 2, reducing the number of bands and moving towards coarser spectral resolution leads to a smoothing of the variance in geographical NH<sub>3</sub> column, this is seen in a relative enhancement of NH<sub>3</sub> over Eastern Europe near Hungary. Taking this in context of not just reproducing NH<sub>3</sub> distribution but also monitoring of emissions and emission levels, these results indicate that a minimum of 4 channels targeting both major NH<sub>3</sub> absorption bands at a resolution of 2 cm<sup>-1</sup> would be a suitable configuration.

#### 4.3 From Hyper-Cam

This section extends that undertaken in section 4.2 to Hyper-Cam measurements and shows essentially similar behaviour in sensitivity to variable spectral resolution and limited band number, with some interesting outliers associated with higher scene resolution, as seen over the resolved rooftop.

Would such a fine spatial scale from space be feasible? If the hypothetical instrument, this study provides tools to evaluate, were based on a Hyper-Cam in low Earth orbit at 600 km, the single pixel spatial scale increases from 5 m x 5 m to 100 m x 100 m, with no equivalent improvement in spectral noise. It might be insightful to average the Hyper-Cam pixel measurements to simulate the spatial resolution of measurements from low Earth orbit and re-run the sensitivity study. Alternatively, can the authors provide an explanation of how this might impact the behaviour in MF,  $\sigma(\text{abs})$ , SNR and FAR shown in the study using the Hyper-Cam.

I would like to see a little more detail on how the Hyper-Cam measurements shown were obtained, the timeframe and flight tracks.
